# Supplementary material for: Synthesis and crystal chemistry of new ternary pnictides containing lithium—adding structural complexity one step at a time
Source: Royal Society of Chemistry journal article supplement (doi:10.1039/c4dt02220c), 2014-09-11

## SUPPORTING INFORMATION

# **Synthesis and crystal chemistry of new ternary pnictides containing lithium – adding structural complexity one step at a time**

*Marion C. Schäfer,<sup>a</sup> Nian-Tzu Suen,<sup>a</sup> and Svilen Bobev\*<sup>a</sup>*

Department of Chemistry and Biochemistry, University of Delaware, Newark, DE, 19716,  
U.S.A.

**Table S1.** Selected interatomic distances (in Å) for  $ALiPn$  ( $M = Ca, Sr, Eu, Yb$ ;  $Pn = As - Bi$ ).

| atomic pair            | CaLiAs   | YbLiAs    | EuLiAs    | CaLiSb    | YbLiSb    |
|------------------------|----------|-----------|-----------|-----------|-----------|
| $A-Pn$                 | 3.001(1) | 2.995(1)  | 3.1270(7) | 3.1965(8) | 3.1875(7) |
| $A-Pn$ (2 $\times$ )   | 3.065(1) | 3.0666(8) | 3.2013(5) | 3.2619(5) | 3.2590(5) |
| $A-Pn$ (2 $\times$ )   | 3.101(1) | 3.1001(8) | 3.2156(5) | 3.3067(6) | 3.3047(5) |
| Li- $Pn$ (2 $\times$ ) | 2.614(4) | 2.625(9)  | 2.651(5)  | 2.786(3)  | 2.764(7)  |
| Li- $Pn$               | 2.737(6) | 2.731(17) | 2.815(11) | 2.858(6)  | 2.853(12) |
| Li- $Pn$               | 2.766(7) | 2.735(17) | 2.885(11) | 2.943(7)  | 2.955(14) |

  

| atomic pair            | EuLiSb    | CaLiBi    | SrLiBi    | YbLiBi    | EuLiBi    |
|------------------------|-----------|-----------|-----------|-----------|-----------|
| $A-Pn$                 | 3.3158(5) | 3.245(2)  | 3.400(1)  | 3.251(1)  | 3.3667(8) |
| $A-Pn$ (2 $\times$ )   | 3.3924(4) | 3.310(1)  | 3.4702(9) | 3.3189(8) | 3.4380(6) |
| $A-Pn$ (2 $\times$ )   | 3.3968(4) | 3.356(2)  | 3.4758(9) | 3.3648(8) | 3.4471(6) |
| Li- $Pn$ (2 $\times$ ) | 2.825(4)  | 2.847(10) | 2.874(10) | 2.786(3)  | 2.836(12) |
| Li- $Pn$               | 2.897(4)  | 2.873(18) | 3.002(21) | 2.858(6)  | 2.976(21) |
| Li- $Pn$               | 3.080(8)  | 2.984(23) | 3.150(23) | 2.943(7)  | 3.178(28) |

**Table S2.** Selected interatomic distances (in Å) for  $A_3Li_4Pn_4$  ( $A = Ba, Eu, Pn = As - Bi$ ).

| atomic pair   | $Eu_3Li_4As_4$ | $Ba_3Li_4Sb_4$ | $Eu_3Li_4Sb_4$ | $Ba_3Li_4Bi_4$ |
|---------------|----------------|----------------|----------------|----------------|
| $A1-Pn1$ (2×) | 3.2419(7)      | 3.6011(4)      | 3.4206(6)      | 3.6176(6)      |
| $A1-Pn2$ (4×) | 3.2108(5)      | 3.5671(6)      | 3.4434(5)      | 3.6634(5)      |
| $A2-Pn1$ (2×) | 3.1413(9)      | 3.4979(7)      | 3.3338(7)      | 3.5562(6)      |
| $A2-Pn2$ (4×) | 3.1540(7)      | 3.4651(4)      | 3.2962(5)      | 3.4769(4)      |
| $Pn2-Pn2$     | 2.496(2)       | 2.822(1)       | 2.833(1)       | 3.0546(9)      |
| $Li-Pn1$ (2×) | 2.668(5)       | 2.963(10)      | 2.835(6)       | 3.040(8)       |
| $Li-Pn1$      | 2.679(10)      | 2.967(5)       | 2.872(11)      | 3.005(15)      |
| $Li-Pn2$      | 2.767(10)      | 3.035(10)      | 2.877(11)      | 3.012(14)      |

**Table S3.** Selected interatomic distances (in Å) for  $Eu_4Li_7Bi_6$ .

| atomic pair    | d (in Å)  | atomic pair    | d (in Å)  | atomic pair    | d (in Å)  |
|----------------|-----------|----------------|-----------|----------------|-----------|
| $Eu1-Bi3$ (2×) | 3.3459(7) | $Li1-Bi3$ (2×) | 2.822(15) | $Li1-Bi3$      | 2.820(25) |
| $Eu1-Bi1$ (2×) | 3.3719(7) | $Li1-Bi1$      | 2.911(30) | $Li1-Bi3$      | 2.860(26) |
| $Eu1-Bi3$      | 3.383(1)  | $Li1-Bi2$      | 2.928(29) | $Li1-Bi2$ (2×) | 2.918(14) |
| $Eu1-Bi2$      | 3.416(1)  |                |           |                |           |
|                |           | $Li2-Bi2$ (2×) | 2.854(13) | $Li1-Bi2$ (2×) | 3.2832(7) |
| $Eu2-Bi2$ (2×) | 3.4614(7) | $Li2-Bi1$      | 2.894(26) | $Li1-Bi3$ (4×) | 3.3427(5) |
| $Eu2-Bi1$ (2×) | 3.4927(8) | $Li2-Bi2$      | 2.891(25) |                |           |
| $Eu2-Bi1$ (2×) | 3.5150(8) |                |           | $Bi1-Bi1$      | 3.046(1)  |

**Figure S1.** Representative results from the EDX analysis of the  $\text{Eu}_4\text{Li}_7\text{Bi}_6$  single-crystals.

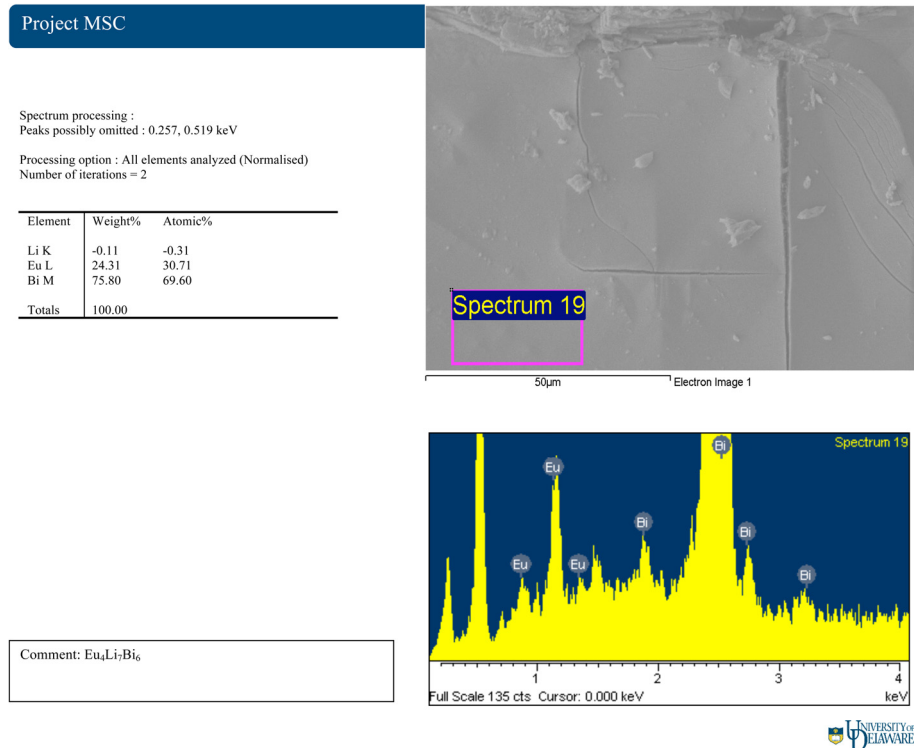

**Figure S2.** Results from the DSC/TG analysis of  $\text{Eu}_3\text{Li}_4\text{Sb}_4$ .

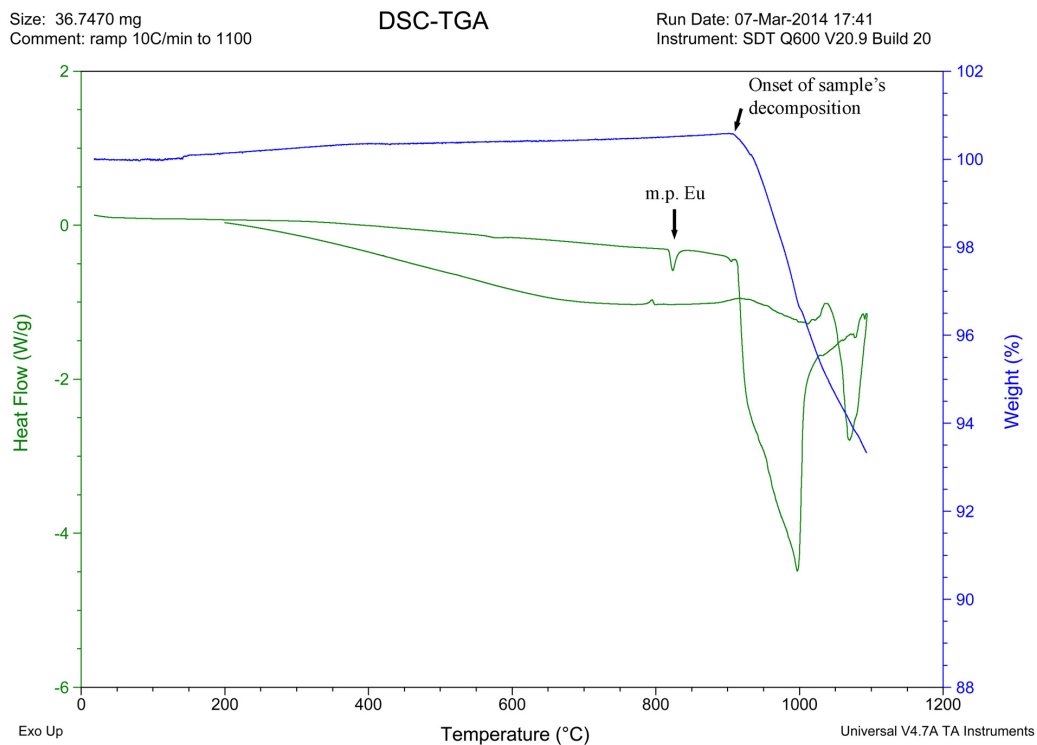

Supplement: c4dt02220c12.pdf [file c4dt02220c12.pdf]
